# Supplementary material
Source: bioRxiv or medRxiv preprint supplement (https://medrxiv.org/highwire/filestream/75393/field_highwire_adjunct_files/0/2020.04.01.20050203-1.pdf)

## Supplementary Material for Seeding COVID-19 across sub-Saharan Africa: an analysis of reported importation events across 40 countries

Laura A Skrip, PhD, Prashanth Selvaraj, PhD, Brittany Hagedorn, MBA, Andre Lin Ouédraogo, PhD, Navideh Noori, PhD, Dina Mistry, PhD, Jamie Bedson, MSSc, Laurent Hébert-Dufresne, PhD, Samuel V Scarpino, PhD, Benjamin M Althouse, ScM PhD

Supplementary Table. Official sources referenced for regular COVID-19 case updates, by country

| Country                          | Sitrep                                             |                      | Dashboard   |      | Website Update                   |                      | Facebook                                             |                      | Twitter                                                                         |                      | Other        |
|----------------------------------|----------------------------------------------------|----------------------|-------------|------|----------------------------------|----------------------|------------------------------------------------------|----------------------|---------------------------------------------------------------------------------|----------------------|--------------|
|                                  | Description                                        | Link                 | Description | Link | Description                      | Link                 | Description                                          | Link                 | Description                                                                     | Link                 | Description  |
| Angola                           |                                                    |                      |             |      | Ministry of Health               | <a href="#">Link</a> | Ministry of Health                                   | <a href="#">Link</a> |                                                                                 |                      |              |
| Benin                            |                                                    |                      |             |      | Ministry of Health               | <a href="#">Link</a> |                                                      |                      |                                                                                 |                      |              |
| Burkina Faso                     |                                                    |                      |             |      | Ministère de la Santé            | <a href="#">Link</a> | Ministère de la Santé                                | <a href="#">Link</a> |                                                                                 |                      |              |
| Cabo Verde                       |                                                    |                      |             |      | Ministry of Health               | <a href="#">Link</a> |                                                      |                      |                                                                                 |                      |              |
| Cameroon                         |                                                    |                      |             |      |                                  |                      |                                                      |                      | Administrateur Civil Principal,<br>Ministre de la Santé<br>Publique du Cameroun | <a href="#">Link</a> | News outlets |
| Central African Republic         |                                                    |                      |             |      |                                  |                      |                                                      |                      |                                                                                 |                      | News outlets |
| Chad                             |                                                    |                      |             |      |                                  |                      |                                                      |                      |                                                                                 |                      | News outlets |
| Côte d'Ivoire                    |                                                    |                      |             |      | Gouvernement de Cote<br>d'Ivoire | <a href="#">Link</a> | Ministère de la Santé<br>et de l'Hygiène<br>Publique | <a href="#">Link</a> |                                                                                 |                      |              |
| Democratic Republic of the Congo | Comité<br>Multisectoriel de la<br>Riposte Covid-19 | <a href="#">Link</a> |             |      |                                  |                      | Comité Multisectoriel<br>de la Riposte Covid-<br>19  | <a href="#">Link</a> |                                                                                 |                      |              |
| Djibouti                         |                                                    |                      |             |      |                                  |                      | Ministere de la Santé<br>de Djibouti                 | <a href="#">Link</a> | Ministere de la Santé de<br>Djibouti                                            | <a href="#">Link</a> |              |

|                   |                    |                      |                                                |  |                                                             |                                 |                                                |                         |                      |              |
|-------------------|--------------------|----------------------|------------------------------------------------|--|-------------------------------------------------------------|---------------------------------|------------------------------------------------|-------------------------|----------------------|--------------|
| Equatorial Guinea |                    |                      | AHORAEG Guinea Ecuatorial <a href="#">Link</a> |  | AHORAEG Guinea Ecuatorial <a href="#">Link</a>              |                                 |                                                |                         |                      |              |
| Eritrea           |                    |                      |                                                |  | Ministry of Information <a href="#">Link</a>                |                                 |                                                | Minister of Information | <a href="#">Link</a> |              |
| Ethiopia          |                    |                      |                                                |  | Ministry of Health <a href="#">Link</a>                     |                                 |                                                | Minister of Health      | <a href="#">Link</a> |              |
| Eswatini          | Ministry of Health | <a href="#">Link</a> |                                                |  | Ministry of Health <a href="#">Link</a>                     |                                 |                                                |                         |                      |              |
| Gabon             |                    |                      |                                                |  |                                                             |                                 | Ministère de la Santé <a href="#">Link</a>     |                         |                      | News outlets |
| Ghana             |                    |                      |                                                |  | Ghana Health Service <a href="#">Link</a>                   |                                 |                                                | Ghana Health Service    | <a href="#">Link</a> |              |
| Guinea            |                    |                      |                                                |  |                                                             |                                 | Ministry of Health <a href="#">Link</a>        |                         |                      |              |
| Guinea-Bissau     |                    |                      |                                                |  |                                                             |                                 | Ministry of Public Health <a href="#">Link</a> |                         |                      |              |
| Kenya             |                    |                      |                                                |  | Ministry of Health <a href="#">Link</a>                     |                                 |                                                | Ministry of Health      | <a href="#">Link</a> |              |
| Liberia           | Ministry of Health | <a href="#">Link</a> |                                                |  |                                                             |                                 |                                                |                         |                      |              |
| Madagascar        |                    |                      |                                                |  | Ministry of Public Health <a href="#">Link</a>              |                                 |                                                |                         |                      |              |
| Mali              |                    |                      |                                                |  |                                                             |                                 |                                                | Government of Mali      | <a href="#">Link</a> |              |
| Mauritania        | Ministry of Health | <a href="#">Link</a> |                                                |  |                                                             |                                 |                                                |                         |                      |              |
| Mauritius         |                    |                      |                                                |  | Ministry of Health and Wellness <a href="#">Link</a>        | Ministry of Health and Wellness | <a href="#">Link</a>                           |                         |                      |              |
| Mozambique        |                    |                      |                                                |  | Ministry of Health <a href="#">Link</a>                     |                                 |                                                |                         |                      |              |
| Namibia           |                    |                      |                                                |  | Ministry of Health and Social Services <a href="#">Link</a> |                                 |                                                |                         |                      |              |

|                       |                                   |                      |                    |                      |                                                     |                      |                                              |                      |                                                     |                      |
|-----------------------|-----------------------------------|----------------------|--------------------|----------------------|-----------------------------------------------------|----------------------|----------------------------------------------|----------------------|-----------------------------------------------------|----------------------|
| Niger                 | WHO and Ministry of Public Health | <a href="#">Link</a> |                    |                      |                                                     |                      |                                              |                      |                                                     |                      |
| Nigeria               |                                   |                      |                    |                      | Nigeria Centre for Disease Control                  | <a href="#">Link</a> |                                              |                      | Nigeria Centre for Disease Control                  | <a href="#">Link</a> |
| Republic of the Congo |                                   |                      |                    |                      |                                                     |                      |                                              |                      |                                                     | Various news outlets |
| Rwanda                |                                   |                      |                    |                      |                                                     |                      |                                              |                      | Ministry of Health                                  | <a href="#">Link</a> |
| Senegal               | Ministry of Health                | <a href="#">Link</a> | Ministry of Health | <a href="#">Link</a> | Ministry of Health                                  | <a href="#">Link</a> | Ministry of Health                           | <a href="#">Link</a> | Minister of Health                                  | <a href="#">Link</a> |
| Seychelles            |                                   |                      |                    |                      | Ministry of Health                                  | <a href="#">Link</a> | Ministry of Health                           | <a href="#">Link</a> |                                                     | Instagram            |
| Somalia               |                                   |                      |                    |                      |                                                     |                      |                                              |                      | Ministry of Health                                  | <a href="#">Link</a> |
| South Africa          |                                   |                      |                    |                      | National Institute for Communicable Diseases (NICD) | <a href="#">Link</a> |                                              |                      | National Institute for Communicable Diseases (NICD) | <a href="#">Link</a> |
| Sudan                 |                                   |                      |                    |                      |                                                     |                      |                                              |                      |                                                     | Various news outlets |
| Tanzania              |                                   |                      |                    |                      |                                                     |                      |                                              |                      |                                                     | Various news outlets |
| Togo                  |                                   |                      |                    |                      | Ministère de la Santé et de l'hygiène Publique      | <a href="#">Link</a> |                                              |                      |                                                     |                      |
| Uganda                |                                   |                      | Ministry of Health | <a href="#">Link</a> |                                                     |                      |                                              |                      | Ministry of Health                                  | <a href="#">Link</a> |
| Zambia                |                                   |                      |                    |                      |                                                     |                      | Account of Ministry of Health and Child Care | <a href="#">Link</a> | Ministry of Health and Child Care                   | <a href="#">Link</a> |

|          |  |  |  |  |  |  |                                              |                      |                                   |                      |  |
|----------|--|--|--|--|--|--|----------------------------------------------|----------------------|-----------------------------------|----------------------|--|
| Zimbabwe |  |  |  |  |  |  | Account of Ministry of Health and Child Care | <a href="#">Link</a> | Ministry of Health and Child Care | <a href="#">Link</a> |  |
|----------|--|--|--|--|--|--|----------------------------------------------|----------------------|-----------------------------------|----------------------|--|

Supplementary Figure. Demonstration of relative contributions of variables considered for the clustering analysis, with higher cos2 values indicating greater contribution

### Variables - PCA

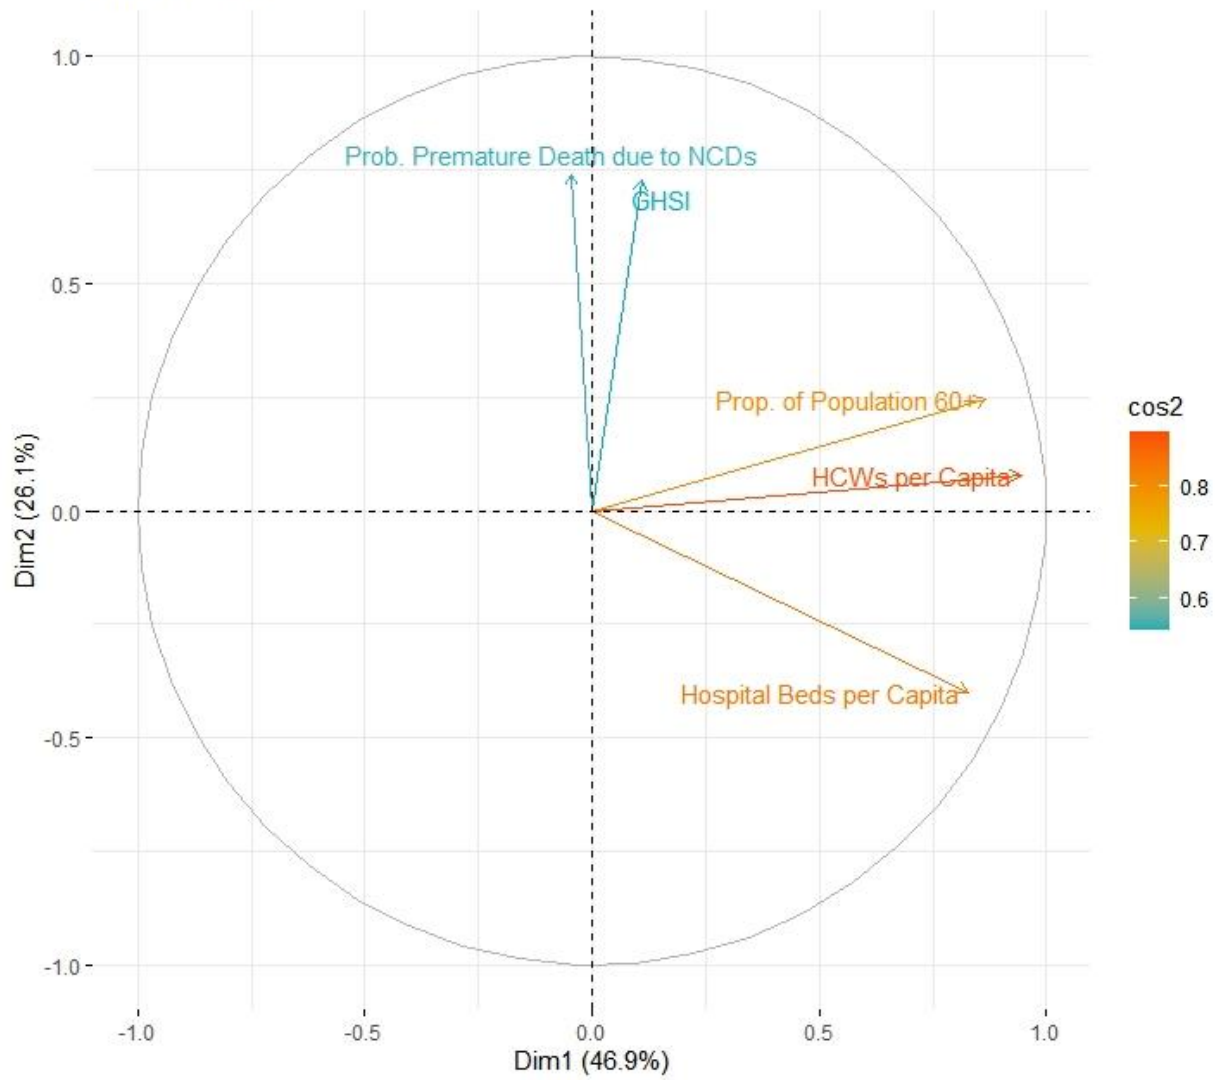

Supplement: Supplementary file [file 2020.04.01.20050203-1.pdf]
